# Supplementary material for: Biocompatible graphene oxide as a folate receptor-targeting drug delivery system for the controlled release of anti-cancer drugs
Source: Royal Society of Chemistry journal article supplement (doi:10.1039/c4ra02466d), 2014-01-01
Supplement: c4ra02466d1.pdf [file c4ra02466d1.pdf]

*Supplementary Information for RSC Advances article:*

**“Biocompatible graphene oxide as folate receptor-targeting drug delivery system for controlled release of anti-cancer drug”**

Xubo Zhao and Peng Liu\*

State Key Laboratory of Applied Organic Chemistry and Key Laboratory of Nonferrous Metal Chemistry and Resources Utilization of Gansu Province, College of Chemistry and Chemical Engineering, Lanzhou University, Lanzhou 730000, China  
Fax./Tel: 86 0931 8912582.

E-mail: pliu@lzu.edu.cn

\* Corresponding author.

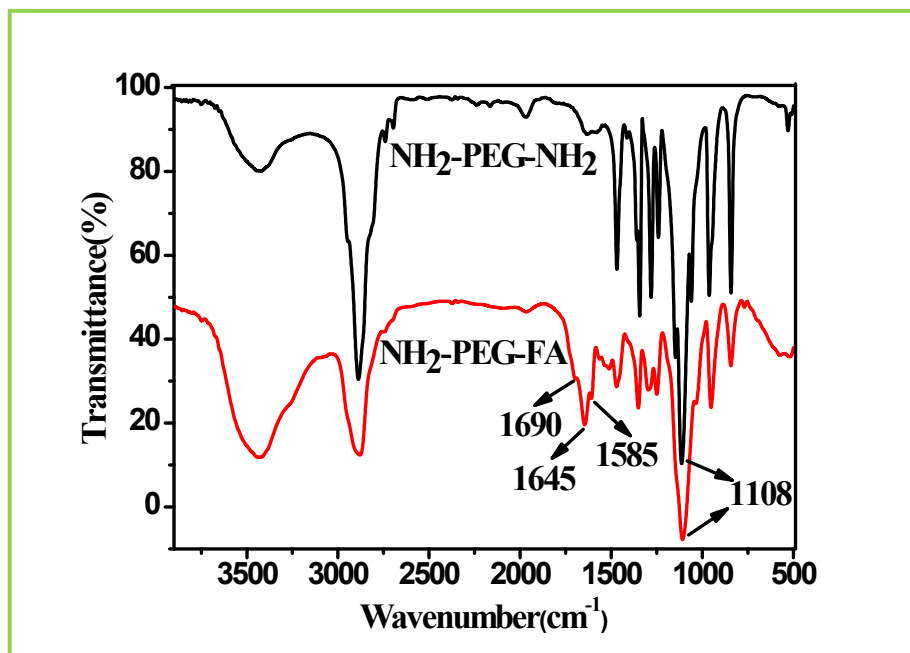

**Fig. S1.** FTIR spectra of the  $\text{NH}_2\text{-PEG-NH}_2$  and  $\text{NH}_2\text{-PEG-FA}$  measured in KBr pellets.

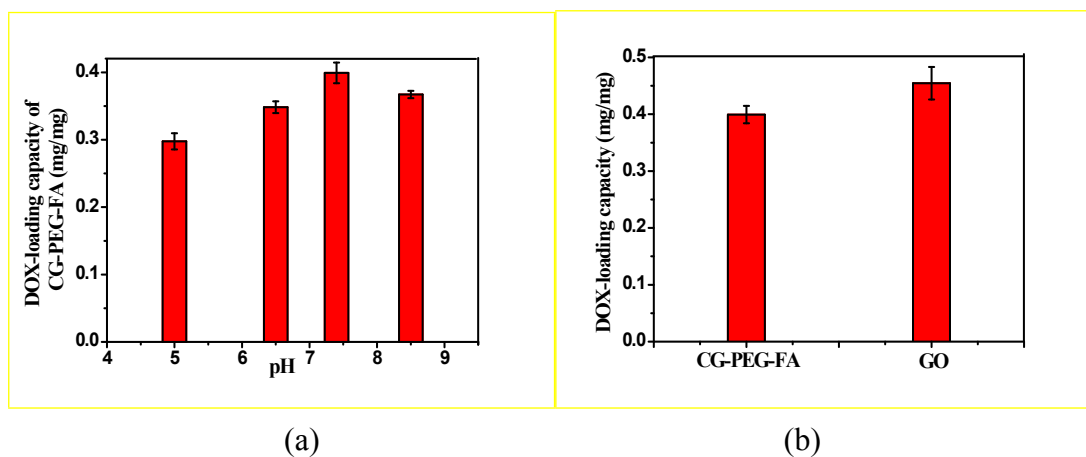

**Fig. S2.** DOX-loading capacity of the CG-PEG-FA nanocarrier at different pH values (a); and DOX-loading capacity of the CG-PEG-FA nanocarrier and the GO nanosheets at pH 7.4 (b).

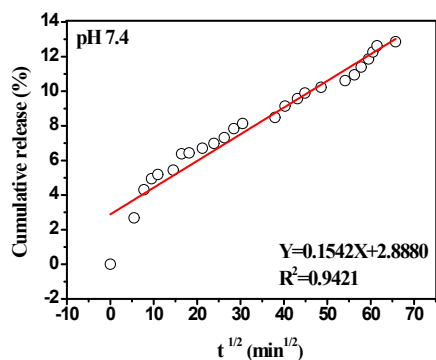

a

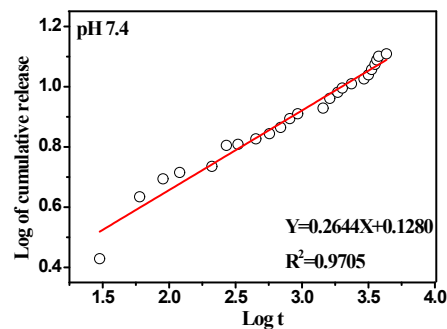

b

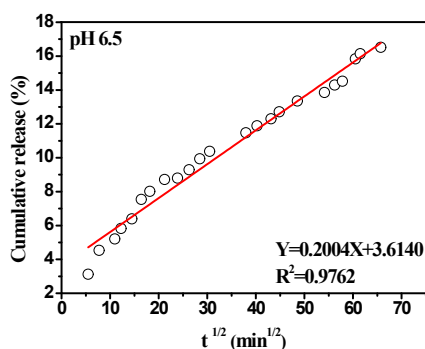

c

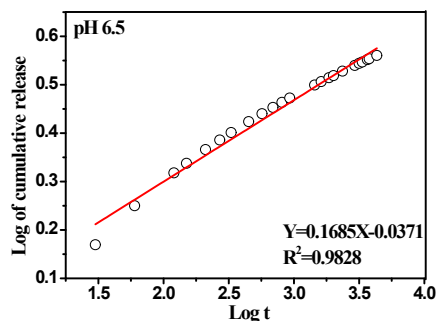

d

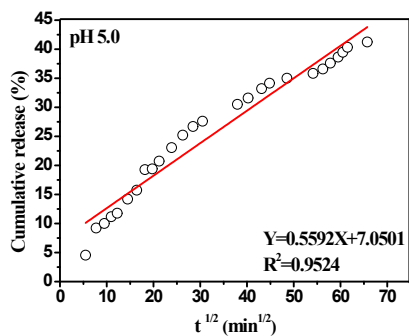

e

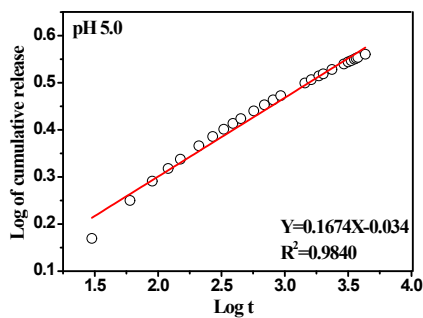

f

**Fig. S3.** The drug release mechanism curves of the Higuchi (a, c and e) and Korsmeyer-Peppas (b, d and f) models of the DOX release from the CG-PEG-FA/DOX at pH values of 7.4, 6.5 and 5.0, respectively.
